# Supplementary material for: Metal-ion-driven self-assembly of sequence-controlled polyprodrugs for pH-responsive tumor theranostics
Source: Royal Society of Chemistry journal article supplement (doi:10.1039/d5tb02114f), 2025-11-25
Supplement: d5tb02114f1.pdf [file d5tb02114f1.pdf]

## Supporting Information

### Metal-Ion Driven Self-Assembled pH-Responsive Polyprodrugs via Click Polymerization for Tumor Theranostics

Daquan Wang<sup>a\*</sup>, Jiali Wang<sup>a</sup>, Yunpeng Luo<sup>b,c</sup>, Gang Tan<sup>a</sup>, Weixun Duan<sup>b</sup>

<sup>a</sup> School of Chemistry, Xi'an Jiaotong University, 710049, Xi'an, China.

<sup>b</sup> Clinical School of Thoracic, Tianjin Medical University, Tianjin, 300070, P. R. China.

<sup>c</sup> Department of Cardiovascular Surgery, Xijing Hospital of Air Force Military Medical University, Xi'an, Shaanxi, 710032, P. R. China

**Corresponding author:** E-mail: wangdaquan2019@mail.xjtu.edu.cn

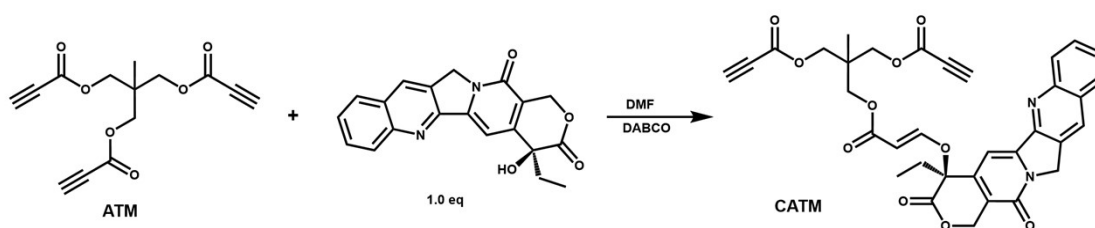

Scheme S1. Synthesis route of CATM.

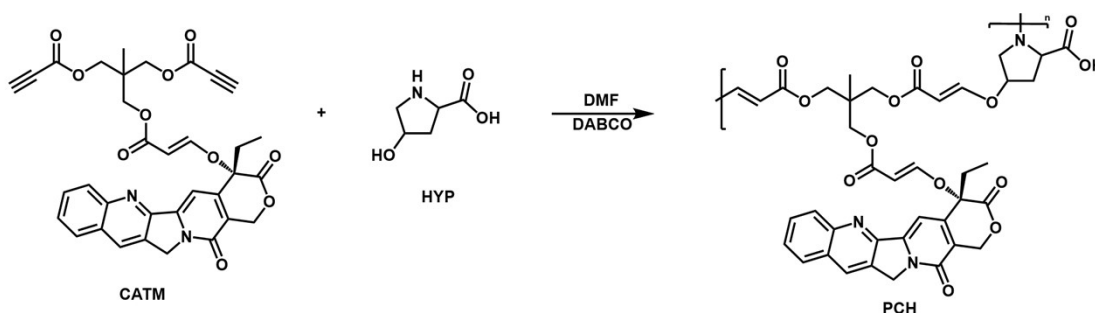

Scheme S2. Synthesis route of PCH.

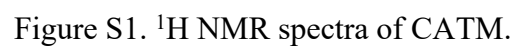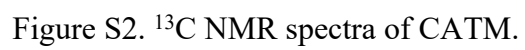

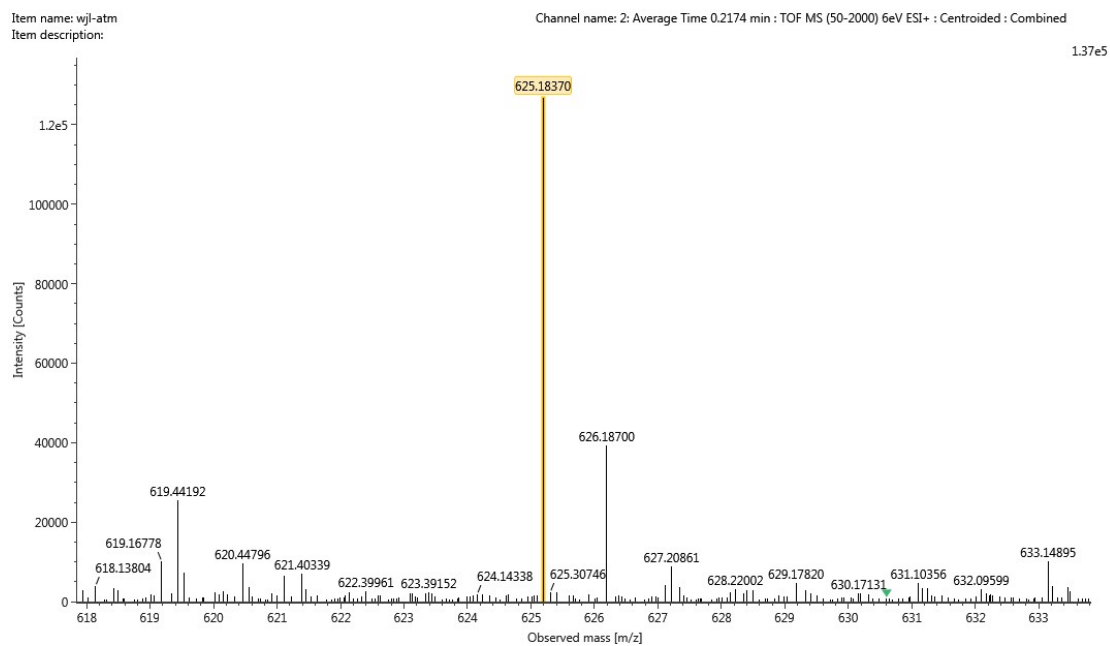

Figure S3. HR-MS spectrum of CATM.

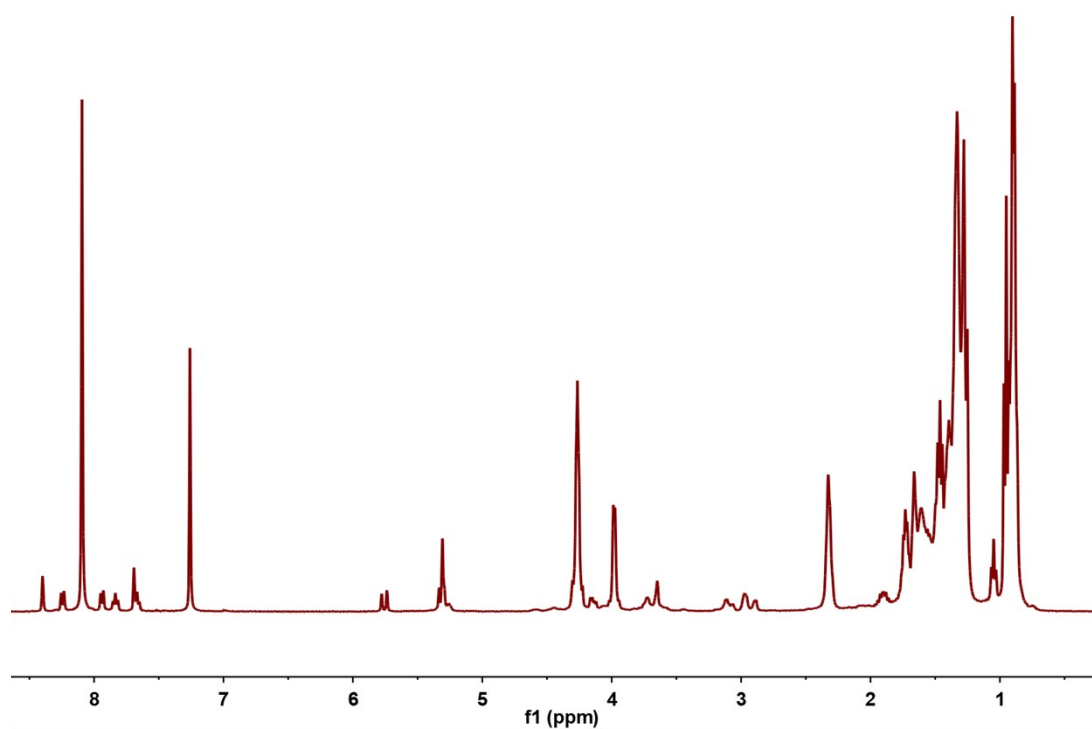

Figure S4. <sup>1</sup>H NMR spectra of PCH.

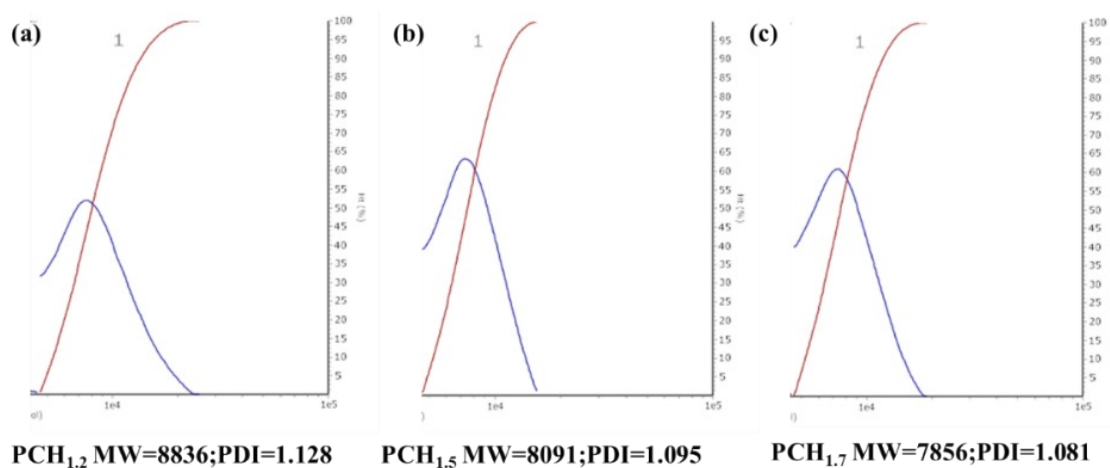

Figure S5. GPC spectra of synthesized PCH under different molar ratio of CATM and HYP. (a)  $\text{PCH}_{1.2}$ , (b)  $\text{PCH}_{1.5}$ , (c)  $\text{PCH}_{1.7}$ .

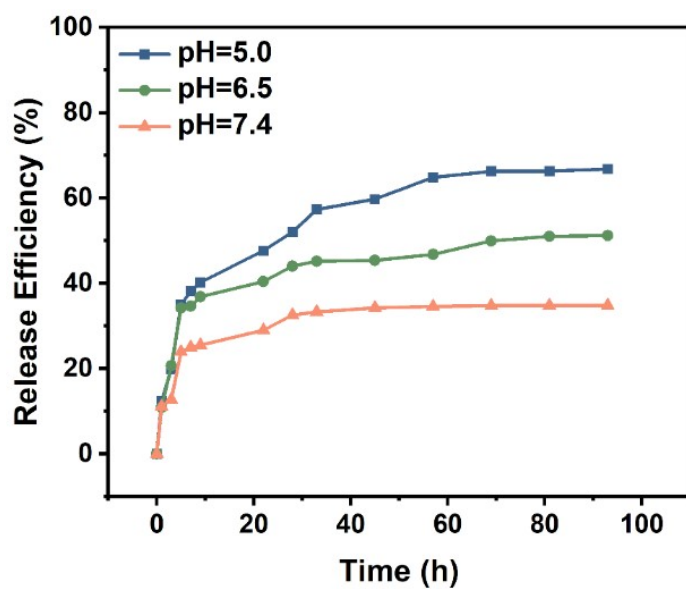

Figure S6. pH responsive controlled release characterization of CPT from PCH in different PBS solutions.

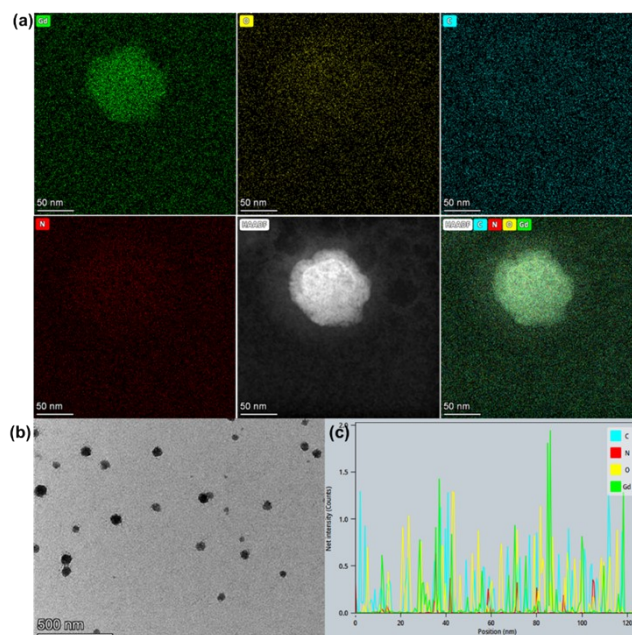

Figure S7. (a) HAADF-TEM image and Element mapping images of metal-ion derived assemble of PCH1.5 with  $\text{Gd}^{3+}$  ions under molar ratio of 1:1. (b): TEM image of PCH@Gd in (a), (c) EDS spectra of PCH@Gd in (a).

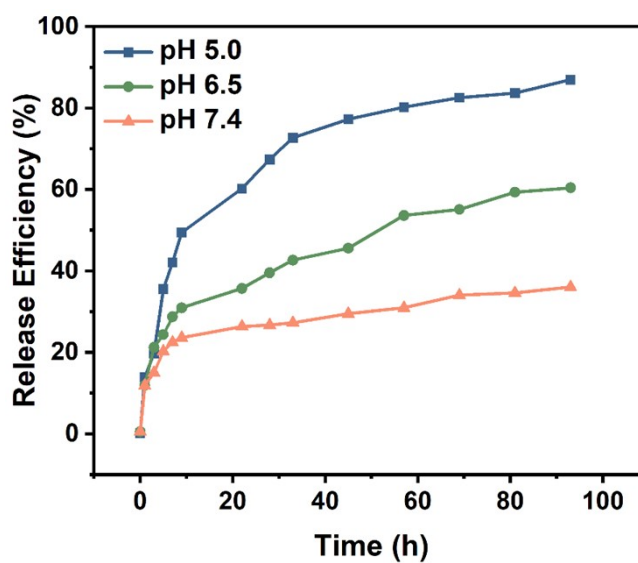

Figure S8. pH responsive controlled release characterization of Gd from PCH@Gd in different PBS solutions.
